# Supplementary material for: Digital Predictors of Morbidity, Hospitalization, and Mortality Among Older Adults: A Systematic Review and Meta-Analysis
Source: Front Digit Health. 2021 Feb 4;2:602093. doi: 10.3389/fdgth.2020.602093 (PMC8521803; doi:10.3389/fdgth.2020.602093)
Supplement: Supplementary file 1 [file Data_Sheet_1.xlsx]

## Sheet: Risk of bias assessment
Nr.	Study	Study design (0= RCTs, 1= CT, 2= PCS, 3=RCT)	Random sequence generation	Allocation concealment	Blinding of participants and personnel	Blinding of outcome assessment	Incomplete outcome data	Selective reporting	Other bias	Total score	Bias due to confounding	Bias in selection of participants into the study	Bias in classification of intervention	Bias due to deviations from intended interventions	Bias due to missing data	Bias in measurement of outcomes	Bias in selection of the reported result	Overall bias	Representativeness of the exposed cohort	Selection of the non-exposed cohort	Ascertainment of exposure	Demonstration that outcome of interest was not present at start of study	Comparability of cohorts on the basis of the design or analysis controlled for confounders	Assessment of outcome	Was follow-up long enough for outcomes to occur	Adequacy of follow-up of cohorts	Overall bias
1	Aboyans 2017	3									Moderate	Low	Low	Low	Low	Low	Low	Moderate	1	1	1	0	0	1	1	1	6
2	Afilalo 2010	2									Moderate	Low	Moderate	Low	Low	Low	Low	Moderate	1	0	1	1	0	1	1	1	6
3	Amar 1996	2									Serious	Serious	Low	Serious	Low	Low	Low	Serious	0	0	1	0	0	1	1	1	4
4	Arboix 2007	3									Low	Low	Low	Low	Low	Low	Low	Low	0	1	1	1	0	1	1	1	6
5	Barnett 2003	3									Serious	Low	Low	Low	Low	Low	Low	Serious	1	0	1	0	0	1	1	1	5
6	Baumert 2019	3									Low	Low	Low	Low	Serious	Low	Low	Serious	1	0	1	1	0	1	1	0	5
7	Berton 2009	2									Serious	Moderate	Low	Low	Low	Low	Low	Serious	1	0	1	0	0	1	1	1	5
8	Buch 2005	2									Moderate	Low	Low	Low	Low	Low	Low	Moderate	1	1	1	0	0	1	1	1	6
9	Buchman 2019	2									Serious	Low	Low	Low	Low	NI	Low	Serious	1	0	1	1	0	1	1	0	5
10	Casella 2005	2									Low	Low	NI	NI	Low	Low	Low	Low	1	1	1	1	0	1	1	1	7
11	Ferrer 2017	2									Moderate	Low	Low	Low	Moderate	Moderate	Loe	Moderate	1	0	1	0	0	1	1	1	5
12	Fisher 2015	2									Low	Low	Low	Low	Low	Low	Low	Low	1	1	1	1	1	1	1	1	8
13	Fujishima 2013	2									Low	Moderate	Low	Low	Low	Low	Low	Moderate	0	1	1	1	0	1	1	1	6
14	Fukumoto 2003	2									Low	Low	Low	Low	low	Low	Low	Low	1	1	1	1	0	1	1	1	7
15	Ho 1997	2									Low	Low	Low	Low	NI	Moderate	Low	Moderate	1	0	1	1	0	0	1	1	5
16	Inoue 2017	2									Low	Low	Low	Low	Low	Low	Low	Low	1	0	1	1	0	1	1	1	6
17	Jones 2004	0	Low	Low	Low	Low	Low	Low	Low	Low
18	Joseph et al., 2016	2									Moderate	Low	Low	Low	Low	Low	Low	Moderate	1	0	1	1	0	1	1	1	6
19	Jotheeswaran 2015	2									Serious	Low	Serious	Low	Serious	Low	Low	Serious	1	0	1	0	0	0	1	0	3
20	Law 2018	3									Serious	Moderate	Moderate	Low	Low	Low	Low	Serious	0	1	1	0	0	1	1	1	5
21	Lee 2013	2									Moderate	Low	Low	Low	Low	Low	Low	Moderate	1	1	1	0	0	1	1	1	6
22	Lion 2012	2									Moderate	Moderate	Low	Low	Low	Moderate	low	Moderate	0	1	1	1	1	0	1	1	6
23	Lyyra 2005	2									Moderate	Low	Low	Low	Moderate	Low	Low	Moderate	0	0	1	1	0	1	1	0	4
24	Matsuzawa 2010	2									Moderate	Low	Low	Low	Low	Low	Low	Moderate	1	0	1	1	0	1	1	1	6
25	Missouris 2004	2									Serious	Low	Low	Low	Moderate	Low	Low	Serious	0	1	1	1	0	1	1	0	5
26	Mujib 2010	0	Low	Low	Low	Low	Low	Low	Low	Low
27	Oberman 2006	2									Low	Low	Low	Low	Low	Low	Low	Low	1	1	1	0	0	1	1	1	6
28	Palmisano 2018	2									Moderate	Low	Low	Moderate	Low	Low	Moderate	Moderate	1	1	1	0	0	1	1	1	6
29	Park et al., 2012	2									Serious	Low	Moderate	Moderate	Serious	Moderate	Low	Serious	1	1	1	0	0	0	1	0	4
30	Philibert 2019	3									Low	Low	Low	Low	Low	Low	Low	Low	1	1	1	1	1	1	1	1	8
31	Pinto 2017	2									Low	Low	Low	Low	Low	Low	Serious	Serious	1	0	1	1	0	1	1	1	6
32	Plakht 2015	3									Serious	Low	Low	Low	Low	Low	Low	Serious	1	1	1	0	0	1	1	1	6
33	Radhakrishnan et al., 2013	3									Serious	Low	Low	Moderate	Low	Moderate	Low	Serious	1	0	1	0	0	0	1	1	4
34	Rolland 2006	2									Serious	Low	Low	Low	Low	Low	Low	Serious	1	1	1	1	0	1	1	1	7
35	Sheng 2016	2									Serious	Low	Low	Low	Low	Low	Low	Serious	1	1	1	1	0	1	1	1	7
36	Smirnova 2019	3									Low	Low	Low	Low	Low	Low	Low	Low	1	0	1	1	0	1	1	1	6
37	Stein 2009	2									Moderate	Low	Low	Low	Low	Low	Kiw	Moderate	1	1	1	1	0	1	0	1	6
38	Tateishi 2016	3									Serious	Low	Low	Moderate	Low	Low	Low	Serious	1	0	1	0	0	1	1	1	5
39	van Vugt 2015	3									Serious	Low	Low	Low	Low	Low	Serious	Serious	1	0	0	0	0	1	1	1	4
40	Ward 2005	3									Moserate	Low	Low	Low	Low	Low	Low	Moderate	1	1	1	0	0	1	1	1	6
41	Wilson 2006	2									Low	Low	Low	Low	Moderate	Serious	Low	Serious	1	0	1	0	0	0	1	1	4
42	Zeitzer 2018	2									Low	Low	Low	Low	Low	Moderate	Low	Moderate	1	0	1	0	0	1	1	1	5
43	Zhu 2019	3									Moderate	Moderate	Low	Low	Low	Low	Low	Moderate	0	0	1	1	0	1	1	1	5

## Sheet: Calculations
Combined means	xa	m	xb	n	xc		Standard deviations https://www.statstodo.com/CombineMeansSDs_Pgm.php
Amar et al., 1996	69	13	63	87	63.78		8.4753
Missouris et al., 2004	69.6	66	72.5	44	70.76	xa = the mean of the first set,	9.99
Law et al., 2018	83.2	53	83.6	115	83.4738	m = the number of items in the first set,	2.48
Berton et al., 2009	67	441	75	64	68.0139	xb = the mean of the second set,
Fisher et al., 2015 subsamble	80.8	1064	83.5	277	81.3577	n = the number of items in the second set,	5.34
Fisher et al., 2015 whole sample	78.3	3569	81.36	1342	79.1362	xc the combined mean.	5.62
	67.5	330	72.4	57	68.2217		12.24
Mathew et al., 2003	64	326	66	424	65.1307		12.6
Arboix et al., 2007	69.5	38	80.2	9	71.5489		10.82
Park et al., 2012	82.7	395	83.2	103	82.8034		5.29

## Sheet: Sample characteristics
Nr.	Study	Sample size N	Diagnosis (0= CVD, 1= Dementia	Sex (%male)	male number	Average age in years	Age range	Spalte1
1	Aboyans et al., 2017	387	Peripheral arterial disease	78	301.86	68.22 (12.24)	68-82
2	Afilalo 2010	131	Scheduled to undergo cardiac surgery	66	86.46	75.8 (4.4)
3	Amar et al., 1996	100	Esophagectomy	74	74	63.78 (8.48)
4	Arboix et al., 2007	47	Thalamic haemorrhage	57.45	27.0015	71.55 (10.82)
5	Barnett et al., 2003	8361	Open heart procedure	74.1	6195.5	63.0 (11.4)
6	Baumert et a., 2019 MrOS	2686	Osteoporosis	100	2686	76.2 (5.4)
	Baumert et a., 2019 SOF	406	No diagnosis	0	0	83.13 (2.94)
7	Berton et al., 2009	505	Acute myocardial infraction	71.5	361.075	68.01 (SD not possible)
8	Buch et al., 2005	946	Age-related macular degeneration	48.84	462.026		60-80
9	Buchman e al., 2019	1249	No diagnosis	23	287.27	80.0 (7.72)
10	Casella et al., 2005	1959	Acute myocardial infraction	70	1371.3	67 (12)	25.7-101.5
11	Ferrer et al., 2017	328	No diagnosis	38.4	125.952	85
12	Fisher et al., 2015	4910	Age-related macular degeneration	43.1	2116.21	79.4 (5.6)
13	Fujishima et al., 2013	187	Coronary artery disease	61	114.07	71 (10)	32-86
14	Fukumoto et al., 2003	1786	Cardiac catheterization	65.5	1169.83	65 (10)	50-79
15	Ho et al., 1997	1483	Mobility decline	50.44	748.025	>70
16	Inoue et al., 2017	4373	No diagnosis	0	0	68.1 (6.6)
17	Jones et al., 2004	988	Heart failure	59	582.92	67 (10)	57-85
18	Joseph et al., 2016	101	Patients with ground-level fall injuries	46.5	47	79 (9)
19	Jotheeswaran et al., 2015	12373	Dementia	37.7	4664.62	74.1 (7.0)	40-92
20	Law et al., 2018	168	Aortic aneurysm	75.6	127.008	83.5 (2.5)
21	Lee et al., 2012	1147	Ischemic stroke	60.2	690.494	64.5 (12.32)
22	Lion et al., 2012	61	No diagnosis	0	0	71.68 (4.28)
23	Lyyra et al., 2005	295	No diagnosis	35.3	104.135	75
24	Matsuzawa et al., 2010	140	Chest pain	0	0	68.157 10.58	50-85
25	Missouris et al., 2004	110	Peripheral vascular disease	60	66	70.76 (9.99)
26	Mujib et al., 2010	7788	Chronic heart failure	75	5841	64 (11)
27	Oberman et al., 2006	3613	No diagnosis	0	0		50-79
28	Palmisano et al., 2018	770	No diagnosis	66.4	511.28	65.5 (14)	80-89
29	Park et al., 2012	498	Discharged from hospital and phone intervention dor 30 days	50	249	82.8 (5.3)
30	Philibert et al., 2019	2278	No diagnosis	46	1047.88	66 (9)
31	Pinto et al., 2017	2968	Global sensory impairment	48.6	1442.45
32	Plakht et al., 2015	2763	Acute myocardial infraction	67.8	1873.31	66.6 (13.3)	50 to 79
33	Radhakrishnan et al., 2013	403	No specific diagnosis	45	181	<60->94
34	Rolland et al., 2006	7250	Hip fracture	0	0	80.5 (3.76)
35	Sheng et al., 2016	4055	Peripheral arterial disease	44.5	1804.47	68.5 (7.5)
36	Smirnova et al., 2019	2978	No diagnosis	51	1518.78	65.9 (9.6)
37	Stein et al., 2009	1655	ICD implantation	82	1357.1	66.81 (11.69)
38	Tateishi et al., 2016	164	Acute ischemic stroke	53	86.92	76 median
39	van Vugt et al., 2015	1614	Colorectal cancer	55.5	895.77	68.6 (10.8)	60-80
40	Ward et al., 2005	309	PAD	43.4	134.106	65.7 (34–94)
41	Wilson et al., 2006	5630	No diagnosis	35.1	1976.13	>70	58-82
42	Zeitzer et al., 2018	2976	Osteoporosis	100	2976	76.4 (5.53)
43	Zhu et al., 2019	186	Bladder cancer	84.4	156.984	65
	Total	92994		47.8%	44460.9

## Sheet: Mortality
Nr.	Study	Predictor type (digitally measurable)	Measured by (digital devices used)	*Comments	Time spectrum	Events in EG	Non-events in EG	Events in CG	Non-events in CG	Value HR (CI). Cases where only ORs (in purple) was extractable.	P value for variables that were not included in the meta-analysis
1	Aboyans et al., 2017	Hypertension			62 months					1.07 (0.78, 1.47)
		Insulin treatment-Diabetes								1.64 (1.14, 2.36)
2	Afilalo 2010	Left ventricular ejection fraction < 40	Stopwatch		not mentioned					2.17 (0.67, 7.05)
3	Amar et al., 1996	Supraventricular tachydysrhythmias (arrhythmias)		RR was calculated for 30-day mortality as HR. I multiplied the denominator including total number of paticipants at risk with 30, since follow-up was too short.	30 days					4.46 (0.33, 60.5)
4	Arboix et al., 2007	Respiratory events								3.30 (0.62, 17.62) p.0.08	p.0.081
		Obesity								2.57 (0.20, 32.41)
5	Barnett et al., 2003	Hypertension			30 days					1.25 (0.94, 1.68)
		Diabetes								1.37 (1.02, 1.84)
		Morbid obesity								0.91 (0.66, 1.25)
		Ejection fraction <40								2.48 (1.73, 3.54)
6	Baumert et a., 2019 MrOS	*Respiratory rate ⩾16 breaths·min−1	Overnight in-home Polysomnography	I estimated the pooled effect size, since these two measurments [1.44 (1.28, 1.62) for MrOS and 1.50 (1.02, 2.19) for SOF] represent different measurement for each gender, based on the population that was included in each study.	8.9 (2.6) years					* 1.44 (1.29, 1.62) - combined outcome	p.<0.00001
	Baumert et a., 2019 SOF	*Respiratory rate ⩾16 breaths·min−1	Overnight in-home Polysomnography		6.4 (1.6) years
7	Berton et al., 2009	Diabetes			7 years					1.7 (1.3, 2.3)
8	Buch et al., 2005	Hypertension			14 years	464	247	113	122	2.03 (1.5, 2.73)
		Diabetes				33	4	544	365	5.54 (1.95, 15.76]
9	Buchman e al., 2019	Standing Posture	Body-fixed sensor		3.6 years					1.21 (1.06, 1.37)
		TUG Walk and Turn	Body-fixed sensor							1.01 (0.86, 1.17)
		TUG Stand to Sit	Body-fixed sensor							1.08 (0.91, 1.28)
		TUG Sit to Stand	Body-fixed sensor							0.87 (0.73, 1.05)
		Slow walking speed	Body-fixed sensor	*1/Walking speed since in the article speed is negetively associated to mortality						1.85 (1.58, 2.99)
10	Casella et al., 2005	Systolic blood pressure ≤ 90			30 days					2.96 (1.90, 4.61)
		Diabetes								3.02 (1.39, 6.56)
		Heart rate > 100 b/min								1.49 (1.03, 2.16)
11	Ferrer et al., 2017	Atrial fibrilation			3 years					2.56 (1.4, 4.6)
12	Fisher et al., 2015	BMI, per kg/m2 increased		Combined results for all-cause mortality across all age-groups for all kinds of maculopathy.	4.8 years					0.97 (0.95, 0.99) and 0.92 (0.88, 0.95)/ 0.97 (0.95, 0.99) and 0.92 (0.89, 0.96) = 0.95 (0.92, 0.98)
		BMI, per kg/m2 low		1/increased BMI						1.05 (1.02, 1.08)
		Hypertension		Combined results for all-cause mortality across all age-groups for all kinds of maculopathy.						1.27 (1.12 , 1.44)
		Diabetes		Combined results for all-cause mortality across all age-groups for all kinds of maculopathy.	4.8 years					1.27 (0.96, 1.52) and 1.27 (0.89, 1.82)/ 1.24 (0.94, 1.48) and 1.22 (0.88, 1.68) = 1.25 (1.07, 1.46)
13	Inoue et al., 2017	Arterial stiffness	Finger photoplethysmogram- triaxial wearable gyroscope sensor	Combined results across all SDPTG d/a quartiles except reference group.	9 years					2.56 (1.59, 5.66) and 2.96 (1.37, 6.39) and 4.17 (1.97, 8.85) = 2.98 (2.08, 4.27)	p.<0.00001
14	Jones et al., 2004	BMI decreased			3.5 years					1.22 (1.06, 1.39)
		BMI inverse 1/BMI								0.81 (0.71, 0.94)
		Diabetes								1.45 (1.06, 1.95)
15	Jotheeswaran et al., 2015	Weight loss			2.8 to 5 years					1.40 (1.19, 1.64)
		Undeeractivity								1.53 (1.32, 1.88)
		Slow walking speed	Standard timed walking test		2.8 to 5 years					1.36 (1.21, 1.51)
16	Law et al., 2018	Hypertension								0.78 (0.26-2.37)
		Diabetes			30 days					1.73 (0.45-6.71)
17	Lee et al., 2012	Abnormal ABI <0.90	Automatic device		30 days					2.33 (1.24, 4.39)	p.0.009
18	Lyyra et al., 2005	Vital capacity	Electronic spirometry	Different HR for mean and women were combined	10 years					0.07 (0.03, 0.19)	p.<0.00001
		Tapping rate,	Electric counter							0.04 (0.77, 0.91)	p.<0.00001
		Muscle strength,								0.73 (0.58, 0.92)	p.0.007
		Walking speed, m/s for 10 m	Stopwatch							2.75 (1.78, 4.25)
19	Missouris et al., 2004	Hypertension	Semi-automated ultrasound sphygmomanometer		6.1 years					1.21 (0.73, 2.01)
		Diabetes								1.49 (0.82, 2.72)
20	Philibert et al., 2019	Systolic Blood Pressure								1.31 (1.18, 1.46)
		Diastolic Blood Pressure								0.67 (0.60, 0.75)	p.<0.0001
		Diabetes								2.15 (1.63, 2.84)
21	Plakht et al., 2015	Hypertension			8.2 years					0.91 (0.8, 1.02)
		Obesity				142	89	925	385	0.66 (0.5, 0.89)
		Atrial fibrillation								1.50 (1.30, 1.73)
		Severe Left ventricular dysfunction								2.12 (1.75, 2.57)	p.0.002
		Concentric or significant Left Ventricular hypertrophy								1.96 (1.49, 2.57)	p.0.788
		Left ventricular dilatation								1.79 (1.3, 2.47)	p.0.003
		Left ventricular filling pressure								1.17 (1.09, 1.24)	p.0.152
		Moderate or severe mitral valve regurgitation								1.47 (1.14, 1.9)	p.<0.001
		Moderate or severe pulmonary hypertension								1.88 (1.48, 2.39)	p.0.001
		Left atrial dilatation								1.24 (1.14, 1.35)	p.0.929
		Right ventricular dysfunction								1.22 (1.1, 1.36)	p.0.159
		Moderate or severe tricuspid regurgitation								1.65 (1.29, 2.1)	p.<0.001
22	Rolland et al., 2006	Walking speed 6m	Stopwatch	A pooled effect size was calculated for these 3 categories [0.61-0.77 m/s HR 1.29 (1.05-1.59) and 0.44-0.60 m/s HR 2.07 (1.60, 2.67) and < 0.43 m/s HR 2.47 (1.67, 3.67), since number 4 is the reference group and number 0 is about not being able to walk at all].	3.8 years					1.83 (1.23, 2.72)
		Repeated chair stands Sit to stand	Stopwatch	A pooled effect size was calculated for all of these categories: < 11.1 s [1.12 (0.85, 1.47)], 11.2-13.6 s [1.23 (0.93, 1.61)], 13.7-16.6 s [1.24 (0.96, 1.61)] and > 16.7s [1.65 (1.23-2.21)].						1.29 (1.10, 1.51)
		Balance test - standing posture	Stopwatch	A pooled effect size was calculated for all of these values: 1.07 (0.883, 1.37), 1.29 (1.04, 1.59), 1.39 (1.07, 1.81) and 1.68 (1.04, 2.69).						1.26 (1.08, 1.48)
		Handgrip strength		lower						1.47 (1.18, 1.83)	p.0.0006
23	Sheng et al., 2016	Hypertension	Blood pressure monitor		5.9 years					2.02 (1.41, 2.89)
		Diabetes								2.81 (1.15, 6.87)
24	Smirnova et al., 2019	Diabetes				74	444	223	2237	1.15 (0.88, 1.52)
		BMI obese			5 years	91	948	97	663	0.66 (0.45, 0.89)
25	Stein et al., 2009	Atrial fibrillation			1 year					2.00 (1.49. 2.68)
		Diabetes								1.78 (1.33, 2.39)
		30<BMIobesity				45	519	42	227	0.47 (0.3, 0.73)
		Decreaed BMI		1/BMI since the article provided the HR of normal BMI to decrased						1.44 (0.92, 2.26)
		LVEF <40				150	1071	28	365	1.83 (1.20, 2.79)
		Increased activity								0.29 (0.17, 0.46)
		Decreased activity		1/increased activity, since it was compared to decrased activity (<5h/week).						3.57 (2.13, 5.98)
26	Tateishi et al., 2016	Hypertension			90 days	9	112	1	42	3.38 (0.42, 27.46)
		Diabetes				4	49	6	105	1.43 (0.39, 5.29)
27	van Vugt et al., 2015	Decreased BMI		RR was calculated for 30-day mortality as HR. I multiplied the denominator including total number of paticipants at risk with 30, since follow-up was too short.	30 days					0.95 (0.3, 3.92)
		Increased BMI								0.60 (0.31, 1.2)
		Obesity				7	238	21	676	0.95 (0.4, 2.26)
28	Zeitzer et al., 2018	Low daytime activity	wrist-worn accelerometer		8 years					1.64 (1.34, 2.00)
		Normal/increased daytime activity	wrist-worn accelerometer	1/low daytime activity						0.61 ( 0.5, 0.74)
29	Zhu et al., 2019	Increased BMI (≥22.6 vs <22.6)			12 months					0.54 (0.26, 1.2)
		Decreased BMI		1/increased BMI						1.85 (0.91, 3.75)

## Sheet: Morbidity
Nr.	Study	Predictor type (digitally measurable)	Measured by (digital devices used)	*Comments	Disease	Severity	Events in EG	Non-events in EG	Events in CG	Non-events in CG	Value OR (CI). Coloured: cases where only HRs (in purple) or IRR (in green) were extractable.	P value for variables that were not included in the meta-analysis.
1	Aboyans et al., 2017	Hypertension			Renal artery stenosis		43	14	203	127	1.92 (1.01, 3.65)
		Diabetes					19	38	63	267	2.12 (1.14, 3.92)
2	Afilalo 2010	Left ventricular ejection fraction < 40	Stopwatch		Morbidity						2.17 (0.67, 7.05)
		Slow walking speed									3.17 (1.17, 8.59)
3	Amar et al., 1996	Hypertension			Supraventricular Tachydysrhythmias (Arrhythmias)		4	9	25	62	1.10 (0.31, 3.91)
		Diabetes					1	12	6	81	1.13 (0.12, 10.17)
4	Berton et al., 2009	Hypertension			Atrial fibrillation ⁄ flutter		43	21	194	247	2.610 (1.5, 4.54)
		Diabetes			Atrial fibrillation ⁄ flutter		17	47	106	335	1.14 (0.63, 2.08)
		Arrhythmias			Atrial fibrillation ⁄ flutter		18	46	128	313	0.96 (0.53, 1.71)	p. 0.44
5	Buchman e al., 2019	Standing Posture	Body-fixed sensor		Mild Cognitive Impairment						1.13 (0.98, 1.32)
		TUG Turn	Body-fixed sensor								1.06 (0.90, 1.25)
		TUG Stand to Sit	Body-fixed sensor								0.97 (0.81, 1.16)
		TUG Sit to Stand	Body-fixed sensor								0.96 (0.82, 1.15)	*Forest plot for balance parameters: measurements for both conditions were combined as they came from different samples
		32-ft Walk speed	Body-fixed sensor	*1/Walking speed since in the article speed is negetively associated to mortality							1.15 (0.93, 1.42)	p.0.20
	Buchman e al., 2019	Standing Posture	Body-fixed sensor		Dementia						0.97 (0.78, 1.19)
		TUG Turn	Body-fixed sensor								0.90 (0.72, 1.12)
		TUG Stand to Sit	Body-fixed sensor								1.03 (0.80, 1.32)
		TUG Sit to Stand	Body-fixed sensor								0.80 (0.61, 1.04)
		32-ft Walk speed	Body-fixed sensor	*1/Walking speed since in the article speed is negetively associated to mortality							1.62 (1.23, 2.14)	p.0.0006
6	Fujishima et al., 2013	Diabetes					26	44	59	58	0.58 (0.32, 1.06)
			ischemia		Ischemia
		Diastolic blood pressure									2.53 (1.19, 5.4)
		Hypertension					55	15	80	37	1.1 (0.85, 3.9)
		BMI									1.09 (0.98, 1.20)
		Ejection fraction <35									1.07 (1.03, 1.12)
7	Fukumoto et al., 2003	Atrial fibrilation			Cholesterol Embolization Syndrome		1	24	68	1693	1.04 (0.14, 7.78)
		Hypertension					18	7	867	894	2.65 (1.10, 6.38)
		Diabetes					10	15	550	1211	1.47 (0.66, 3.29)
		LVEF<45					2	23	129	1632	1.10 (0.26, 4.72)
8	Ho et al., 1997	Hypertension			Mobility decline						1.1 (0.8, 1.6)
		Diabetes									1.5 (0.8, 2.5)
		BMI decreased	Digital standing scale								1.6 (1.1, 2.4)
		BMI increased	Digital standing scale								0.9 (0.5, 1.5)
		Slow walking speed	Stopwatch								1.13 (1.09, 1.16)
9	Jotheeswaran et al., 2015	Slow walking spped	Standard timed walking test	IRR was reported separatety since it could'nt be converted to OR	Incident dependence						1.28 (1.12, 1.47) IRR	p.0.003
10	Lion et al., 2012	Systolic blood pressure			Dizziness						1.01 (0.96, 1.05)
11	Matsuzawa et al., 2010	Reactive hyperemia peripheral arterial tonometry index	Digital reactive hyperemia peripheral arterial tonometry (RH-PAT)		Isch-emic heart disease (IHD)						0.51 (0.38, 0.68)	p.<0.00001
		Increased BMI									1.06 (0.95, 1.18)
		Systolic blood pressure									1.02 (1.00, 1.05)
		Diastolic blood pressure									0.92 (0.95, 1.01)
		Diabetes									1.23 (0.96, 1.57)
12	Mujib et al., 2010	Hypertension			Neurological deficit						0.89 (0.51, 1.56)
		Diabetes									1.43 (0.80, 2.57)
		Ejection fraction <35									0.97 (0.54, 1.72)
13	Mujib et al., 2010	Hypertension			Stroke						1.52 (1.16, 1.98)
		Diabetes									1.43 (1.08, 1.89)
		Ejection fraction <35									0.94 (0.71, 1.24)
14	Oberman et al., 2006	Systolic blood pressure			Hypertrophied left ventricular mass						1.18 (1.08, 1.28)
		Diabetes mellitus									2.24 (1.18, 4.26)
		Hypertensive									1.61 (1.16, 2.24)
15	Palmisano et al., 2018	*Physical Activity <2h day	Implantable cardioverter defibrillator	*Both low daily activity measurements were combined PA <2h day 5.91 (1.90, 18.34) and 2-2.9h day 5.21 (1.59, 17.05) into one.	Atrial Arrhythmias						*5.56 (2.45, 12.64)	*p.<0.0001
		*2-2.9h day
16	Pinto et al., 2017	Diabetes mellitus			Impaired mobility						1.47 (1.09, 2.00)
		Hypertensive									0.92 (0.64, 1.33)
		BMI under									1.58 (0.59, 4.20)
		BMI over									0.74 (0.48, 1.12)
		BMI obese									1.12 (0.76, 1.63)	p.0.57
17	Tateishi et al., 2016	Hypertension			Unfavorable outcome		33	12	88	31	0.97 (0.45, 2.11)
		Diabetes					9	36	44	75	0.44 (0.19, 0.96)
		Atrial fibrillation					26	19	42	77	2.51 (1.25, 5.06)
18	Ward et al., 2005	Abnormal ABI <0.90			V ejection fraction < 35%						2.48 (1.22, 5.07)	p.0.01
		Hypertension									2.20 (0.83, 5.82)
		Diabetes									1.94 (1.08, 3.48)
19	Wilson et al., 2006	BMI increased			Hip fracture						1.1 (0.64, 1.98)
		BMI decreased									1.3 (0.77, 2.15)
		Hypertension									0.9 (0.59, 1.37)
		Walking difficulty/slow walking speed									1.7 (1.03, 2.96)

## Sheet: Hospitalisation
Nr.	Study	Predictor type (digitally measurable)	Measured by	*Comments	Condition that can be predicted	Duration Length of Stay EG mean	Duration Length of Stay CG mean	Readmission	Events in EG	Non-events in EG	Events in CG	Non-events in CG	Value OR (CI). Coloured: cases where only HRs (in purple) were extractable.	P value for variables that were not included in the meta-analysis.
1	Amar et al., 1996	Supraventricular tachydysrhythmias (arrhythmias)			ICU admissiom	24 (14)	18 (12)		7	6	5	81	18.9 (4.59, 77.87)	p. 0.000
2	Joseph et al., 2016	Upper-extremity function-frailty	Triaxial wearable gyroscope sensor		Permanent hospitalisation	5.85 (5.31)	4.44 (2.98)		24	29	8	40	4.14 (1.63, 10.51)	p.0.000
								30-day readmission	19	34	10	38	2.12 (0.89, 5.16)	p.0.045
								60-day readmission	28	25	15	33	2.37 (1.05, 5.33)	p. 0.019
3	Park et al., 2012	Weakness		*n 498				30-day readmission	32	56	186	221	0.68 (0.42, 1.09)	p.0.055
		Pain		*n 498					10	63	115	307	0.42 (0.21, 0.85)	p.0.008
		Palpitations		*n 498					5	38	34	418	1.62 (0.6, 4.38)	p. 0.172
		Fatigue		*n 395					30	239	5	121	3.04 (1.15, 8.03)	p.0.013
		Fever		*n 395					1	9	34	351	1.15 (0.14, 9.33)	p.0.45
		Weight gain		*n 395					5	15	30	345	3.83 (1.30, 11.27)	p.0.007
		Difficulty breathing		*n 395									1.58 (0.68, 3.64)	p. 0.144
4	Radhakrishnan et al., 2013	Pulmonary co-morbidity			Hospitalisation								3.43 (1.12, 10.5)	p.0.031
		Obesity											2.69 (1.0, 7.19)	p.0.048
		Arrhythmia co-morbidity											0.6 (0.36, 1.0)	p.0.051
5	van Vugt et al., 2015	Increased BMI				7.4 (2.0)	8.2 (2.0)	Readmission	75	527	94	603	0.91 (0.66, 1.26)	p. 0.291
		Decreased BMI				8.2 (1.9)	8.2 (2.0)		9	61	94	603	0.95 (0.46, 1.97)	p. 0.441
		Obesity				7.4 (2.0)	8.2 (2.0)		34	211	94	603	1.03 (0.68, 1.58)	p.0.44
